# Supplementary material for: A new age model for the Pliocene of the southern North Sea basin: a multi-proxy climate reconstruction
Source: Copernicus journal article supplement (doi:10.5194/cp-16-523-2020), 2020-03-12
Supplement: Supplementary file 1 [file Data_for supplement.xlsx]

## Sheet: Readme
A new age model for the Pliocene of the Southern North Sea Basin: a multi proxy climate reconstruction
Emily Dearing Crampton-Flood1*, Lars J. Noorbergen2, Damian Smits1, R. Christine Boschman1, Timme H. Donders4, Dirk K. Munsterman5, Johan ten Veen5, Francien Peterse1, Lucas Lourens1, Jaap S. Sinninghe Damsté1,3
1Department of Earth Sciences, Utrecht University, Utrecht, The Netherlands
2Department of Earth Sciences, VU University Amsterdam, Amsterdam, The Netherlands
3Department of Marine Microbiology and Biogeochemistry, NIOZ Royal Netherlands Institute for Sea Research and Utrecht University, The Netherlands
4Department of Physical Geography, Utrecht University, Utrecht, The Netherlands
5TNO-Geological Survey of the Netherlands, Utrecht, The Netherlands
Correspondence to: Emily Dearing Crampton-Flood (emily.dearingcrampton-flood@manchester.ac.uk)
*Present address: School of Earth and Environmental Sciences, The University of Manchester, Manchester, The United Kingdom

## Sheet: Sheet2
Isotope data					Marine temperature proxies										Age vs. Depth
δ18Ocass. (‰ vs. VPDB)	δ13Ocass. (‰ vs. VPDB)	Depth (m)			Depth (m)	Uk37 (°C) (Müller et al., 1998)		Depth (m)	LDI SST (°C) (Rampen et al., 2012)		Depth (m)	TEX86H (°C) (Kim et al., 2010)			Age (ka)	δ18Ocass. (‰ vs. VPDB)	Depth (m)
2.15643	-0.0376	204			137	15.4543		137	8.63145		219	8.75871			2768	0.680246	206
0.680246	-2.1706	206			178	16.2436		138	12.5972		225	9.13507			2772.13	1.24344	207
1.24344	0.1346	207			181	21.0791		140	14.3267		232	10.1605			2776.27	1.37319	208
1.37319	-0.7572	208			182	22.0367		141	15.9952		235	10.7032			2788.67	1.7982	211
1.7982	-0.4622	211			183	19.5104		143	14.7709		240	15.7822			2792.8	1.932	212
1.932	0.3674	212			184	15.5046		144	13.2704		245	6.50645			2796.93	2.34354	213
2.34354	-0.261	213			185	19.703		145	12.769		246	10.5638			2809.33	1.19788	216
1.19788	-0.6674	216			186	17.4988		149	14.7879		250	7.40744			2813.47	1.6134	217
1.6134	-0.5494	217			190	12.9308		150	15.3705		252	12.2675			2817.6	1.517	218
1.517	-0.9608	218			192	15.1529		152	15.5568		254	11.7901			2825.87	0.4604	220
0.4604	-0.6784	220			194	16.8158		158	13.2896		256	12.1902			2830	0.133597	221
0.133597	-2.2528	221			195	23.9419		176	7.98882		258	11.798			2833.33	2.44815	222
2.44815	-0.9602	222			197	13.7881		182	6.75896		259	10.4452			2836.67	2.98838	223
2.98838	-0.8558	223			211	10.0891		183	5.78427		260	8.57314			2840	2.38853	224
2.38853	0.194	224			240	13.9018		184	6.27412		261	8.74551			2843.33	1.58433	225
1.58433	-0.4352	225			254	14.8824		185	6.74037		263	11.8836			2850	2.01717	227
2.01717	-1.9384	227			256	13.1877		186	7.57955		264	10.9208			2853.33	2.16168	228
2.16168	-0.8616	228			258	19.1424		263	15.5126		265	10.4251			2860	1.01037	230
1.01037	-0.427252	230			259	20.5333		264	16.2759		266	10.9085			2867.5	1.5098	231
1.5098	-0.5292	231			260	21.2117		265	17.0249		268	10.9073			2875	0.630557	232
0.630557	-2.4954	232			261	22.0182		266	15.4831		269	13.1037			2882.67	2.97235	233
2.97235	-0.3176	233			263	18.2245		268	15.4131		270	9.15921			2890.33	-0.222743	234
-0.222743	-1.64832	234			264	18.3923		270	12.6387		271	11.994			2898	2.4178	235
2.4178	-0.4912	235			265	18.2447		272	9.02792		272	10.253			2904.71	1.3728	236
1.3728	-0.4964	236			266	19.9463		273	8.50808		273	9.3868			2911.43	1.56616	237
1.56616	-0.338529	237			268	17.8252		274	8.44135		274	11.05			2918.14	1.7568	238
1.7568	-0.2192	238			269	11.3434		275	8.29235		275	11.386			2924.86	1.2084	239
1.2084	-0.9962	239			270	18.6149		276	7.18495		276	10.0077			2931.57	2.1498	240
2.1498	-0.677	240			271	17.5701		277	6.38143		277	9.30248			2945	0.416484	242
0.416484	-0.317062	242			272	17.8566		279	6.36976		278	10.4345			2948.33	0.99514	243
0.99514	-0.494671	243			273	15.7366		280	7.21322		279	8.99206			2951.67	1.22057	244
1.22057	-0.0298512	244			274	17.9619		281	6.39889		280	10.3301			2955	1.616	245
1.616	-0.4132	245			275	14.34		282	5.57045		281	10.7263			2958.33	1.716	246
1.716	-0.413	246			276	15.354		283	6.07975		282	10.1915			2961.67	1.3366	247
1.3366	0.1608	247			277	18.2472		284	6.49456		283	9.42739			2965	1.3384	248
1.3384	-0.0234624	248			278	14.4649		285	6.21552		284	9.91839			2968.33	1.47915	249
1.47915	-0.591186	249			279	16.9046		287	6.09548		285	10.6625			2971.67	1.7782	250
1.7782	-0.0838	250			280	16.7857		288	5.41857		286	11.7638			2978.33	1.5241	252
1.5241	-1.1276	252			281	14.4327		291	5.43816		287	7.98052			2981.67	2.1524	253
2.1524	-0.2878	253			282	16.3214		292	4.62077		288	9.45225			2985	1.23097	254
1.23097	-0.245499	254			283	14.0564		293	8.03889		291	9.86485			2990.56	3.0378	255
3.0378	-0.1674	255			284	11.8852		294	9.24078		292	8.36905			2996.11	1.8956	256
1.8956	-0.9862	256			285	13.1632		295	9.95904		293	11.2968			3001.67	1.67472	257
1.67472	-0.332372	257			286	11.0941		336	11.0677		294	9.95206			3007.22	1.95303	258
1.95303	-0.4556	258			287	15.0224		339	10.402		295	10.637			3018.33	1.7956	260
1.7956	-0.7524	260			288	16.0002		353	22.5685		296	10.54			3029.44	2.39	262
2.39	-0.4296	262			291	13.2873		356	23.9148		298	13.6758			3035	1.07556	263
1.07556	-0.0629968	263			292	12.3416		357	23.6634		300	6.84645			3037.27	1.82315	264
1.82315	-0.4132	264			293	16.6584		363	20.9298		303	8.40446			3041.82	1.60471	266
1.60471	-1.3798	266			294	16.432		367	22.3229		305	9.70584			3044.09	1.81381	267
1.81381	0.24397	267			295	19.9244		371	22.6152		307	7.90032			3046.36	1.61718	268
1.61718	-0.3044	268			296	22.8351		390	13.2017		308	8.89994			3048.64	2.68668	269
2.68668	-0.5388	269			305	15.1604		394	16.1793		309	11.1368			3050.91	1.6606	270
1.6606	-0.2566	270			307	15.5074					311	11.684			3053.18	2.25915	271
2.25915	-0.8162	271			308	12.9099					315	7.64494			3055.45	1.27538	272
1.27538	-0.5778	272			309	20.0329					316	11.0093			3060	1.03682	274
0.729432	-3.3232	273			311	20.7997					317	10.3618			3064.5	1.27376	275
1.03682	-0.885	274			316	15.7384					318	9.31982			3073.5	1.87652	277
1.27376	-0.8494	275			317	23.9252					319	10.5304			3082.5	1.78325	279
1.87652	-0.6024	277			318	21.7764					320	8.39374			3087	2.1583	280
1.78325	-1.1732	279			319	17.6127					321	9.50695			3091.5	1.9642	281
2.1583	-0.4654	280			320	18.3654					322	9.90431			3096	2.72159	282
1.9642	-0.0474	281			321	17.3772					323	10.087			3105	0.818419	284
2.72159	-0.6544	282			322	20.0362					324	9.91452			3111.25	2.83002	285
0.818419	-0.533442	284			323	10.2119					325	10.4616			3117.5	3.05982	286
2.83002	-0.353	285			324	23.2895					326	11.0521			3123.75	1.8156	287
3.05982	-1.021	286			325	20.7906					328	9.7513			3130	1.69285	288
1.8156	-0.9022	287			326	19.7535					330	9.57664			3136.25	1.6872	289
1.69285	-0.8538	288			328	23.2556					332	10.5441			3142.5	3.55602	290
1.6872	-0.7718	289			330	20.9004					334	11.7965			3155	0.965098	292
3.55602	-0.7356	290			332	22.642					336	7.8641			3165.5	2.16199	295
0.745306	-2.9044	291			334	22.9538					339	9.7925			3169	1.40912	296
0.965098	-0.719145	292			336	20.4956					340	10.4467			3183	2.7262	300
2.16199	-0.8568	295			339	15.0735					341	9.33764			3190	1.0734	302
1.40912	-0.484898	296			340	14.3957					342	8.42825			3196.73	2.03241	303
2.7262	-0.5488	300			341	20.4216					343	11.4007			3203.45	2.36603	304
1.0734	-0.160238	302			342	16.4466					344	10.447			3210.18	2.62	305
2.03241	0.130189	303			343	23.6486					348	10.5752			3216.91	-0.9048	306
2.36603	-0.385991	304			344	8.58202					350	10.0772			3223.64	-0.862721	307
2.62	-0.2086	305			348	23.1476					352	7.15248			3237.09	1.927	309
-0.9048	-0.8784	306			350	15.8125					353	9.52297			3243.82	-0.3362	310
-0.862721	-0.555842	307			352	14.5361					354	8.73546			3250.55	1.8428	311
1.927	-0.4386	309			353	19.2234					356	10.9964			3257.27	1.95945	312
-0.3362	-1.24	310			354	22.1786					357	7.65767			3264	2.69717	313
1.8428	-0.0978	311			356	20.0001					360	7.84735
1.95945	-0.227934	312			357	19.5151					361	8.86678
2.69717	0.114536	313			360	19.1342					362	11.6182
0.0921222	0.388162	315			361	13.8098					363	9.27632
0.490255	0.390691	316			362	20.417					365	8.39121
1.10809	0.495782	318			363	19.3595					367	8.09808
0.404	0.491	319			365	20.329					369	9.91561
0.9032	-0.24	320			367	19.7015					371	10.3311
1.35433	-0.0422176	321			371	20.2084					374	9.90882
0.7406	0.2786	322			374	15.4191					376	8.22199
0.88178	0.260489	323			376	19.0411					378	12.397
0.726664	0.192383	324			378	18.7414					379	10.0715
0.759962	0.147	325			379	19.0804					380	10.0458
1.14783	0.5916	326			380	18.4138					381	7.32487
0.967745	0.4176	327			381	21.1252					382	11.5504
0.321695	0.0394856	329			382	21.9749					383	10.3349
-0.597592	0.117393	331			383	21.9877					384	10.0629
-0.250739	-0.0960432	333			384	16.3836					385	9.03175
1.41746	-0.586681	334			385	21.1212					386	11.8719
2.45702	-0.467924	335			386	7.89002					390	8.28081
2.51888	-0.4904	336			394	19.59					394	9.71998
2.6804	-0.1944	337			396	15.6188					396	10.3442
1.55669	-0.280318	338			398	19.3676					398	8.59753
1.99418	-0.378396	339			399	14.2187					399	11.5087
1.4	-0.5	340			400	17.6271					400	8.69055
1.92469	-0.0766056	341			401	17.3855					401	11.2264
1.5974	-0.1868	342			404	19.8287					404	12.4937
1.92289	-0.158957	343
2.2446	-0.5218	344
2.13661	-0.209381	345
2.8516	-0.3072	347
3.16251	-0.132214	348
1.80127	-0.256487	349
1.46983	-0.562348	350
1.08282	-0.534806	351
2.26	-0.2126	352
2.80093	-0.4088	353
2.47113	-0.6516	354
1.06262	0.0816808	355
1.45577	-0.6022	356
2.26062	-0.8412	357
0.951	-1.2658	358
0.680876	-0.540818	359
2.38742	-0.759	360
1.1642	-0.9424	361
1.42349	-0.0218	362
2.17524	-1.3864	364
2.5108	-0.742	367
2.9444	-0.1706	368
1.54152	-0.315539	370
2.25303	-0.606	373
-1.01561	-3.8304	378
2.2916	-0.9902	380
1.41696	-0.416397	382
-0.433489	-0.6338	383
