# Supplementary material for: A new age model for the Pliocene of the southern North Sea basin: a multi-proxy climate reconstruction
Source: Copernicus journal article supplement (doi:10.5194/cp-16-523-2020), 2020-03-12
Supplement: Supplementary file [file cp-16-523-2020-supplement-title-page.pdf › cp-16-523-2020-supplement-title-page.pdf]

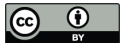

## *Supplement of*

# **A new age model for the Pliocene of the southern North Sea basin: a multi-proxy climate reconstruction**

**Emily Dearing Crampton-Flood et al.**

*Correspondence to:* Emily Dearing Crampton-Flood ([emily.dearingcrampton-flood@manchester.ac.uk](mailto:emily.dearingcrampton-flood@manchester.ac.uk))

- [cp-16-523-2020-supplement-title-page.pdf](#)
- [Supplementary\\_DC-Flood](#)
  - [Data\\_for supplement.xlsx](#)
  - [HankCoP\\_SupplFigs.pdf](#)

The copyright of individual parts of the supplement might differ from the CC BY 4.0 License.
